# Supplementary material
Source: Royal Society of Chemistry journal article supplement (doi:10.1039/d6dd00045b)
Supplement: d6dd00045b3.pdf [file d6dd00045b3.pdf]

## Supplementary Files

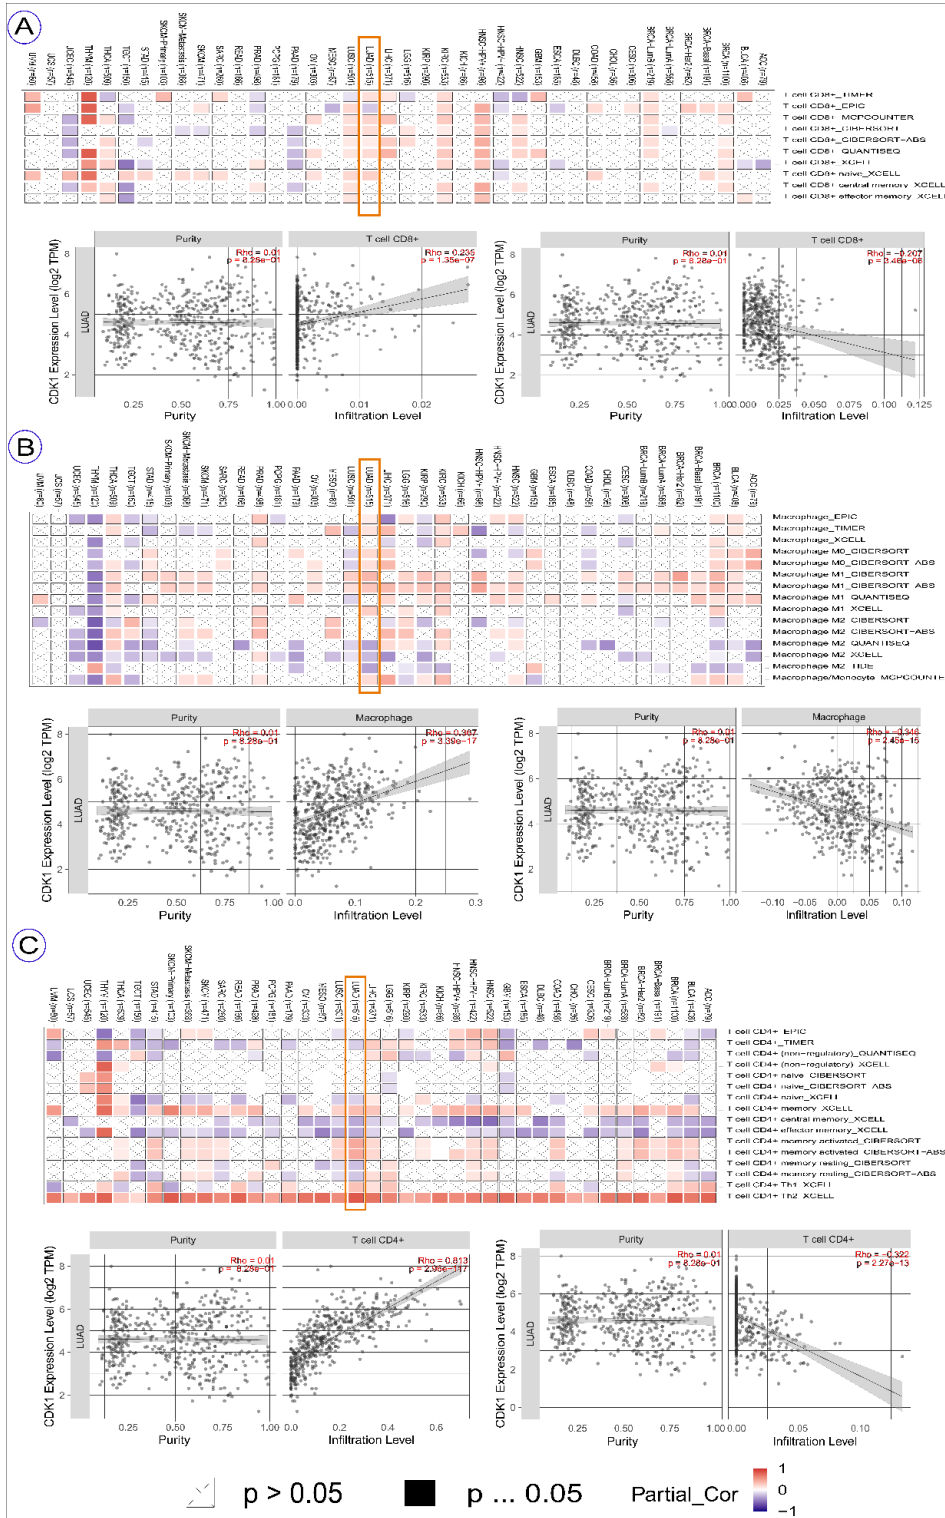

**Figure S1.** Correlation of CDK1 Expression with Immune Cell Infiltration in LUAD Across CD8+ T Cells (A), Macrophages (B) and CD4+ T Cells (C).

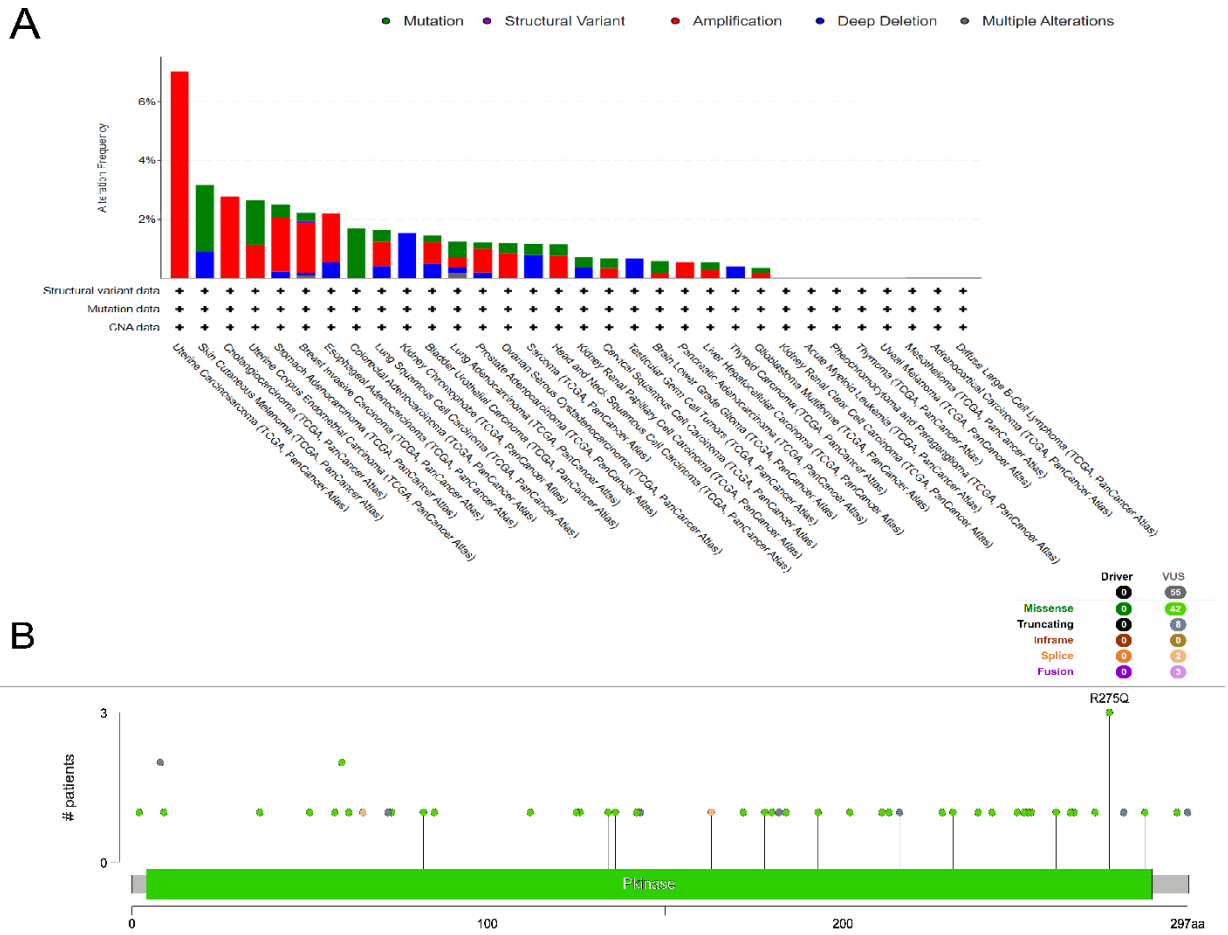

**Figure S2.** Genetic alterations of CDK1 across cancers. (A) Alteration frequency and types in TCGA datasets. (B) Mutation spectrum and genomic distribution of CDK1 variants.

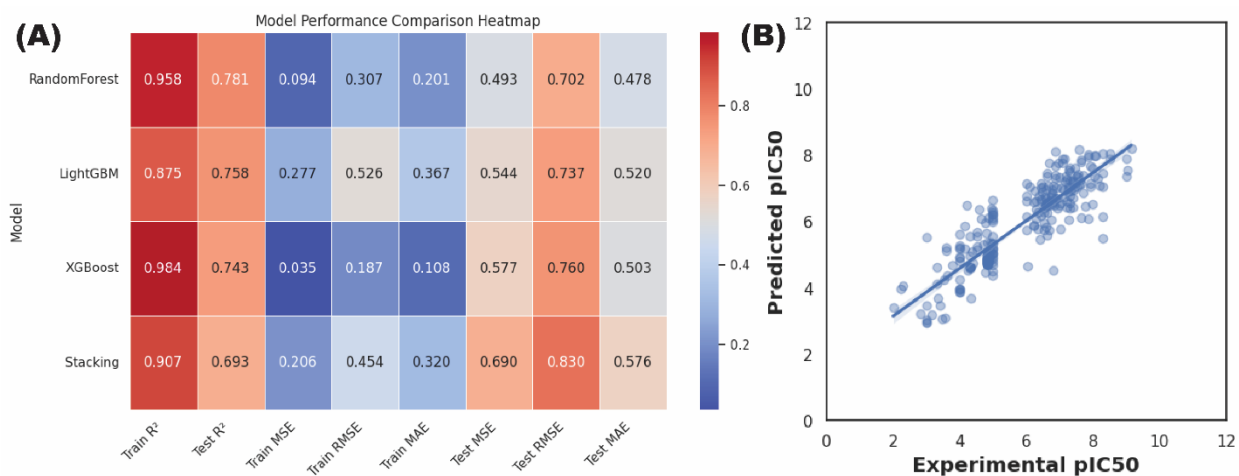

**Figure S3.** (A) Heatmap illustrating the performance of four machine-learning regression models (RandomForest, XGBoost, LightGBM, and Stacking) across training and testing metrics for CDK1 inhibitor prediction. (B) Scatter plot showing the correlation between experimentally observed pIC50 values and LightGBM-predicted pIC50 values, demonstrating the model's strong predictive accuracy.

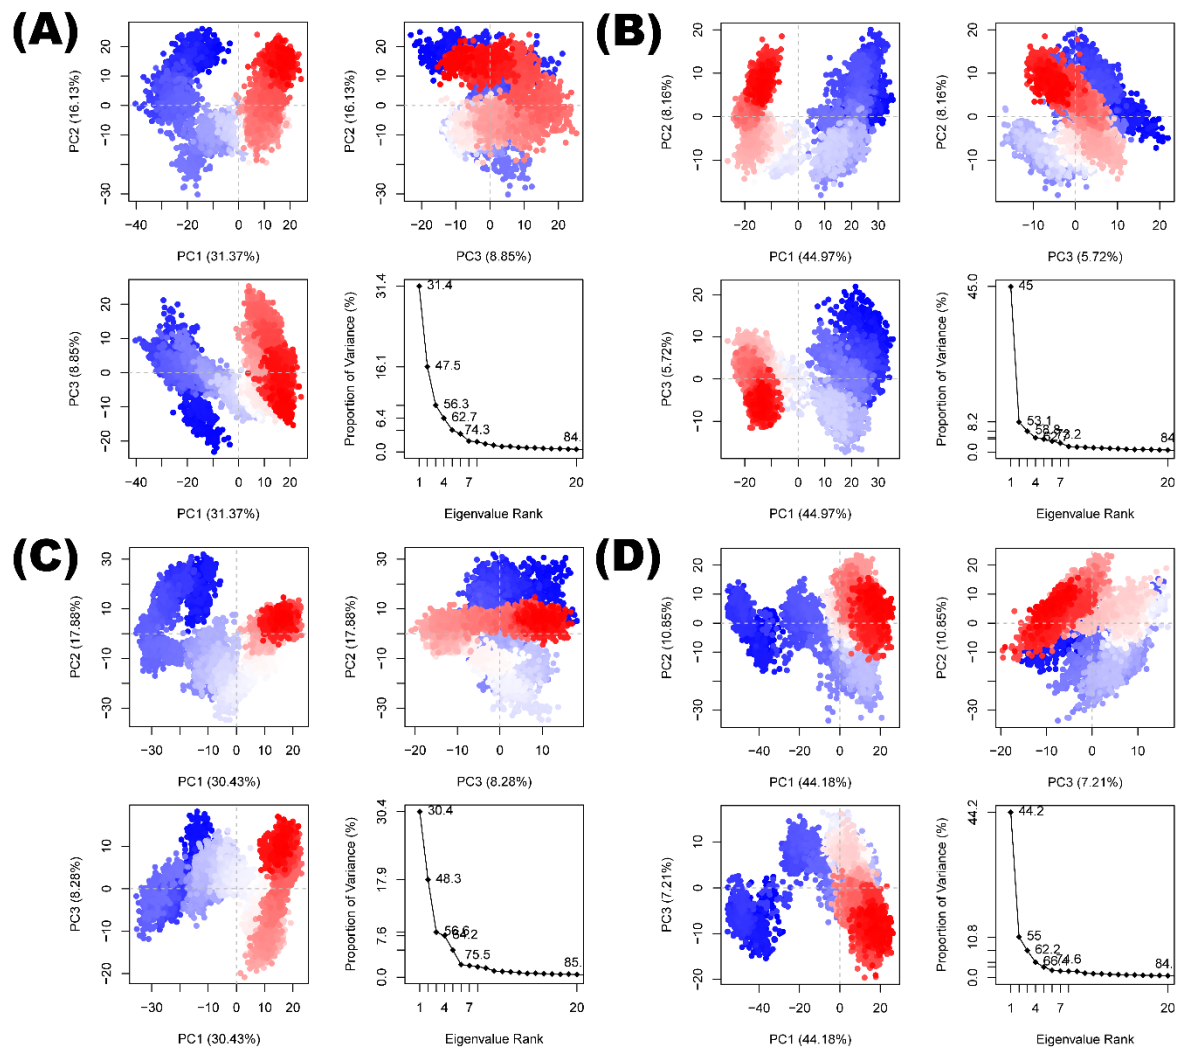

**Figure S4.** Principal Component Analysis (PCA) Biplots and Scree Plots of CDK1 Complexes: (A) 6GU7\_487089, (B) 6GU7\_174880, (C) 6GU7\_14218027, and (D) Control (AZD5438)

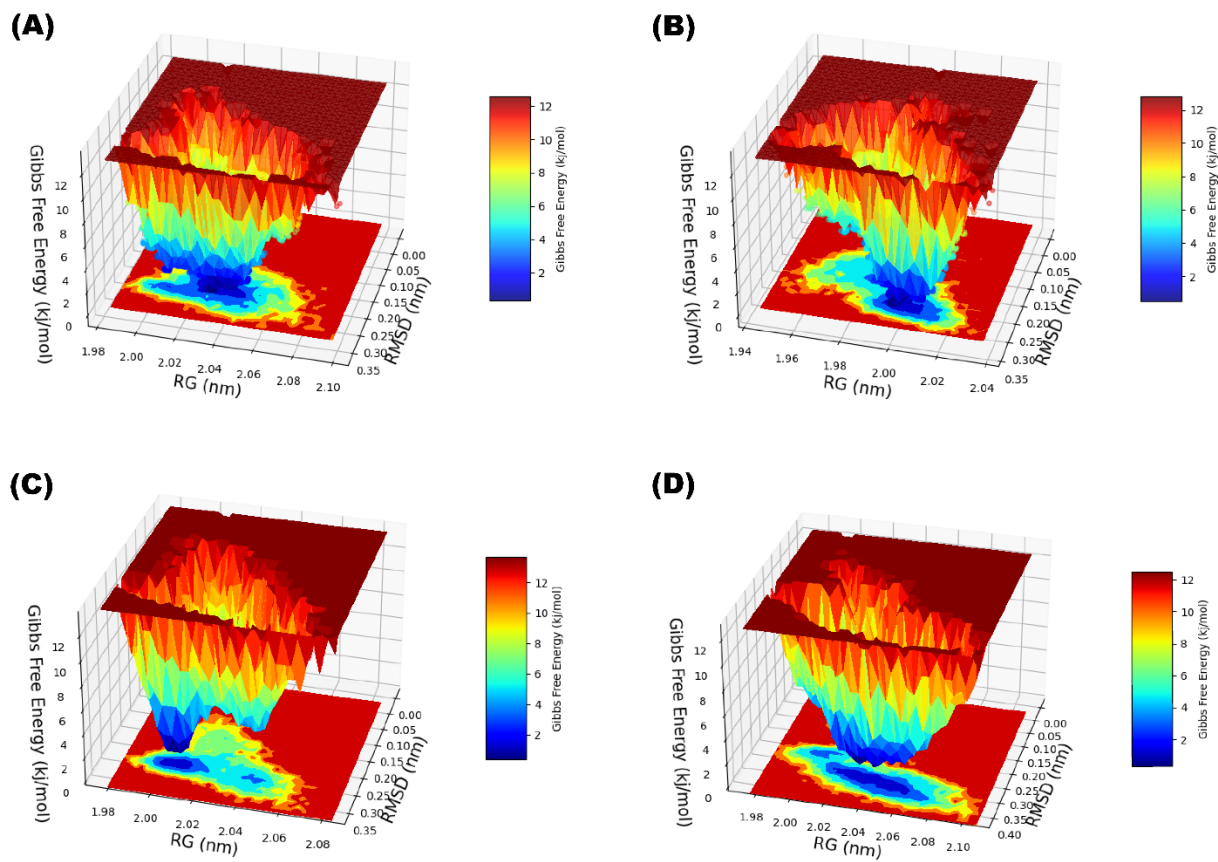

**Figure S5.** Gibbs Free Energy Landscapes of CDK1-Inhibitor Complexes: (A) 6GU7\_487089, (B) 6GU7\_174880, (C) 6GU7\_14218027, and (D) Control (AZD5438).
